# Supplementary material
Source: PubMed Central journal article supplement (PMC1502561)

**A**  $Xm/Xp^{GFPn}$ 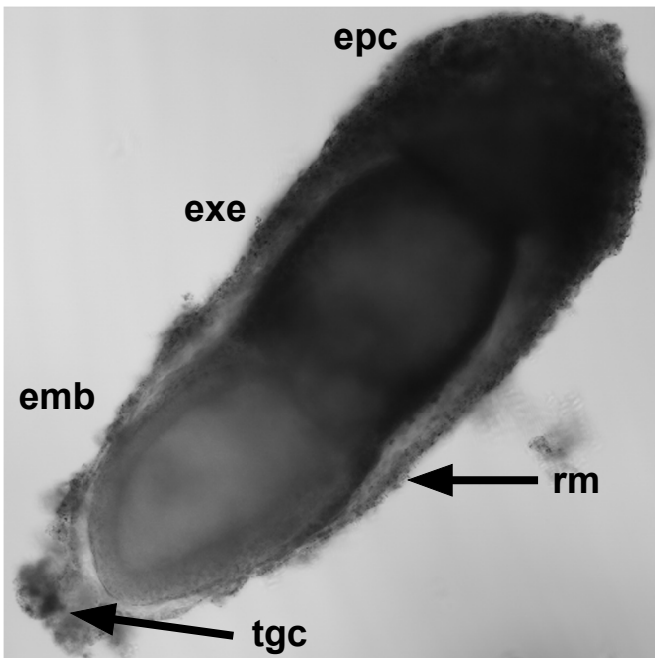**B**  $Xm/Xp^{I-GFPn-I}$ 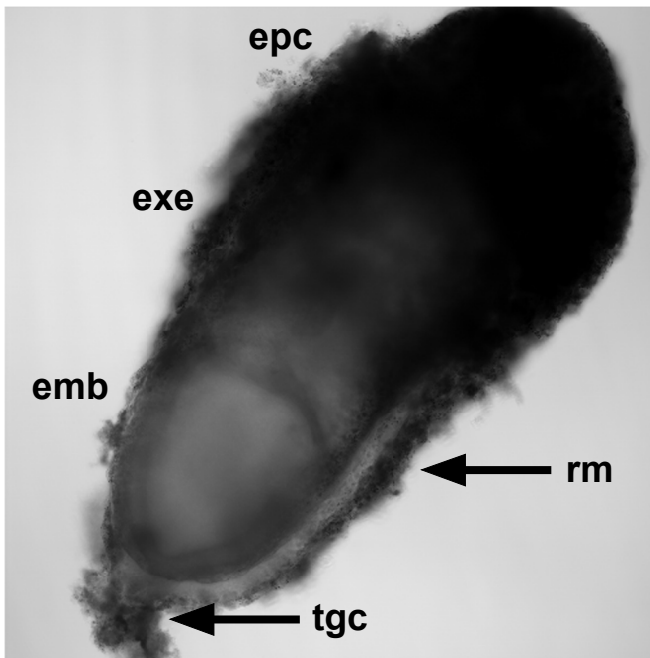**C**  $Xm/Xp^{II-GFPn-II}$ 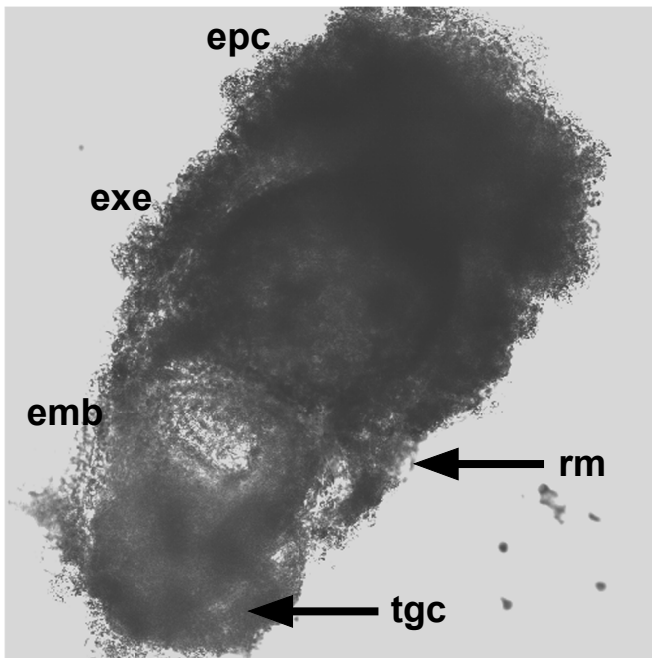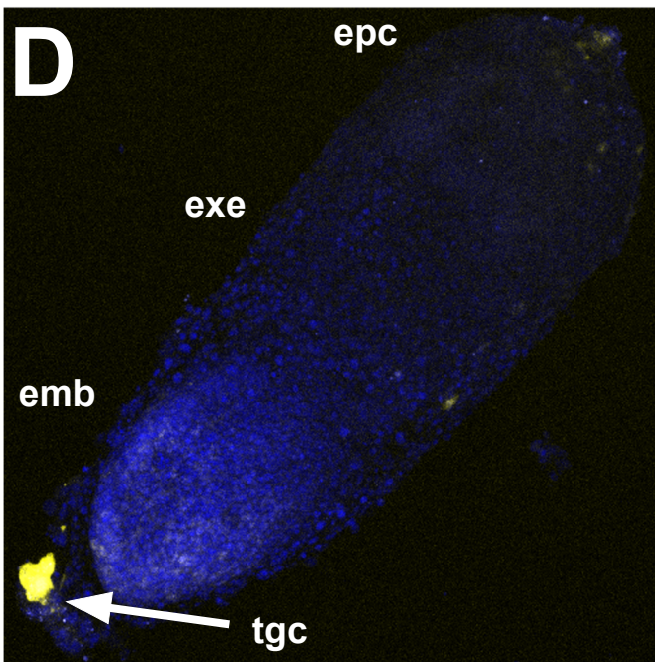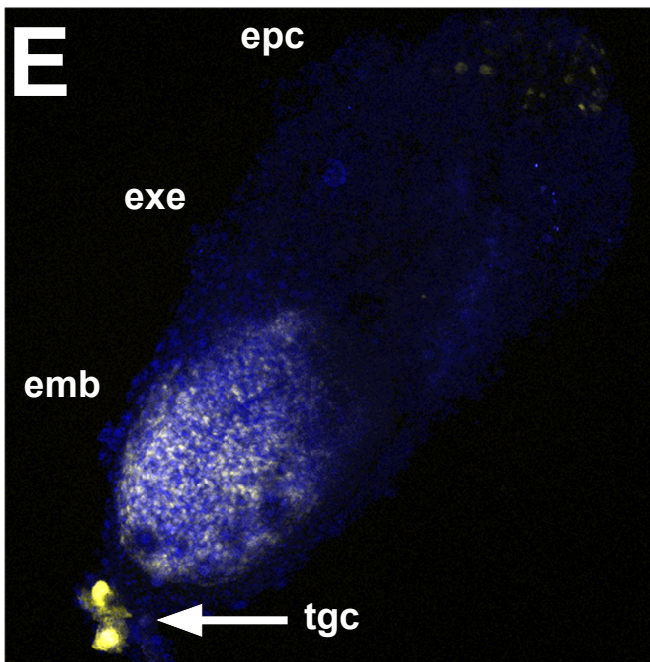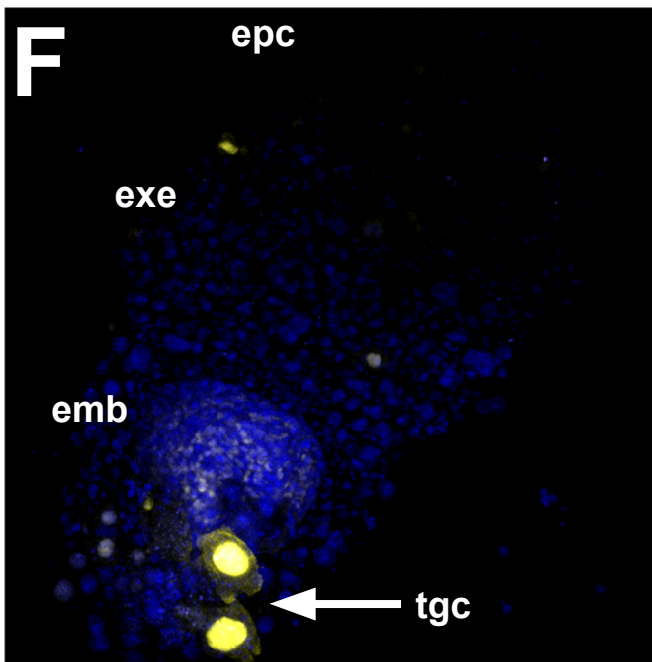

Supplement: pnas_0603754103_1.pdf [file pnas_0603754103_1.pdf]

# A

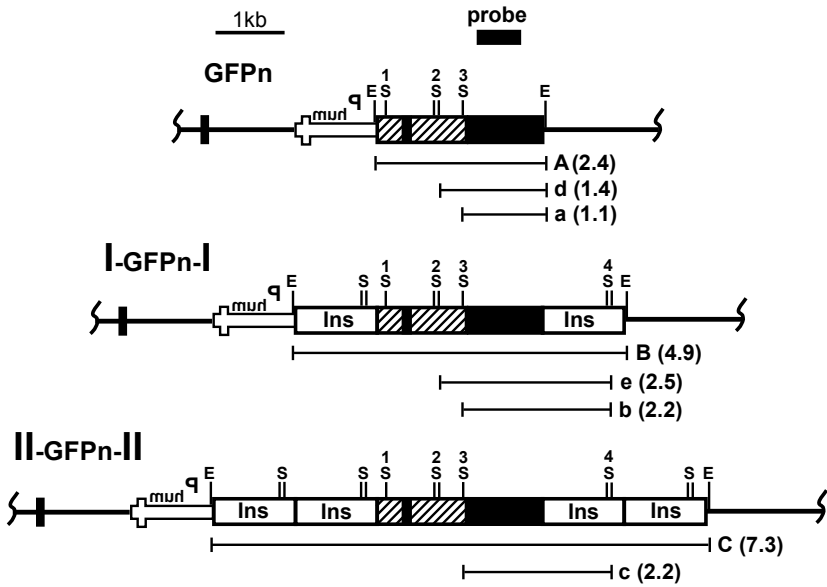

# B

**male spl (GFP+)**

**male ES (GFP+)**

Eco  
0 1 2

Eco/Sma  
0 1 2

Eco/Xma  
0 1 2

Eco  
0 1 2

Eco/Sma  
0 1 2

Eco/Xma  
0 1 2

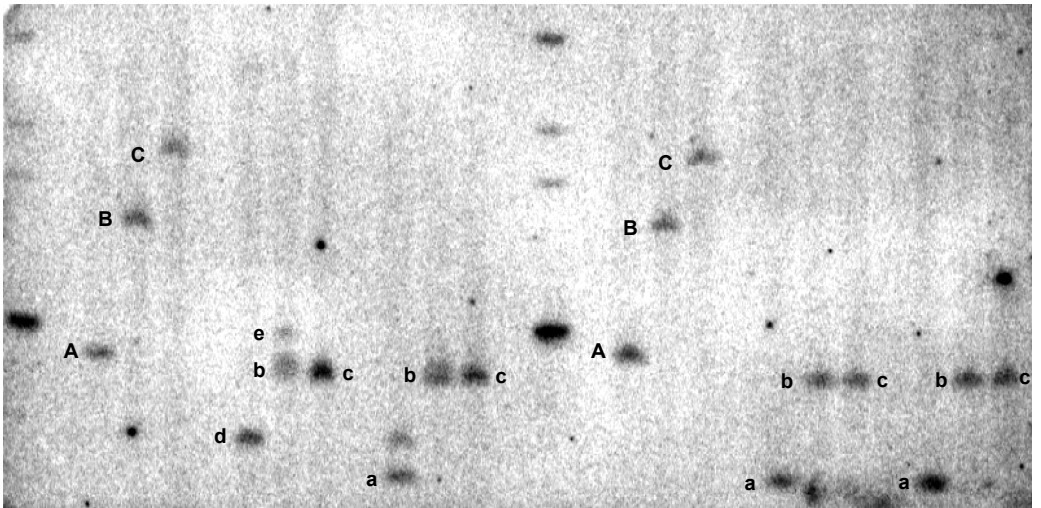

Supplement: pnas_0603754103_2.pdf [file pnas_0603754103_2.pdf]
